# Supplementary material for: Association between Erythrocyte Membrane Phospholipid Fatty Acids and Sleep Disturbance in Chinese Children and Adolescents
Source: PubMed Central journal article supplement (PMC5872762; doi:10.3390/nu10030344), 2018-03-12
Supplement: nutrients-10-00344-s001.pdf [file nutrients-10-00344-s001.pdf]

**Table S1.** Percentage coefficient of variation of 25 fatty acids.

| Fatty acid | Mix Std <sup>a</sup> |      |        | Samples |      |        |                |
|------------|----------------------|------|--------|---------|------|--------|----------------|
|            | Mean                 | SD   | CV (%) | Mean    | SD   | CV (%) | P <sup>b</sup> |
| 14:0       | 3.69                 | 0.21 | 5.69   | 0.20    | 0.07 | 35.00  | 0.51           |
| 15:0       | 3.62                 | 0.18 | 4.97   | 0.10    | 0.03 | 33.33  | 0.62           |
| 16:0       | 3.60                 | 0.17 | 4.72   | 25.69   | 3.77 | 14.67  | 0.13           |
| 16:1n-7    | 3.59                 | 0.17 | 4.73   | 0.27    | 0.08 | 29.6   | 0.64           |
| 17:0       | 3.53                 | 0.17 | 4.82   | 0.24    | 0.05 | 20.83  | 0.07           |
| 18:0       | 3.37                 | 0.17 | 5.04   | 15.07   | 1.72 | 11.41  | 0.09           |
| 18:1n-9    | 3.56                 | 0.16 | 4.49   | 15.57   | 1.52 | 9.76   | 0.31           |
| 18:2n-6    | 3.52                 | 0.13 | 3.69   | 10.67   | 1.74 | 16.31  | 0.33           |
| 18:3n-6    | 3.48                 | 0.12 | 3.45   | 0.06    | 0.02 | 33.33  | 0.73           |
| 18:3n-3    | 3.43                 | 0.12 | 3.50   | 0.10    | 0.03 | 30.00  | 0.11           |
| 20:0       | 3.54                 | 0.16 | 4.52   | 0.39    | 0.09 | 23.07  | 0.14           |
| 20:1n-9    | 3.46                 | 0.12 | 3.47   | 0.33    | 0.08 | 24.24  | 0.19           |
| 20:2n-6    | 3.46                 | 0.11 | 3.18   | 0.25    | 0.06 | 24.00  | 0.22           |
| 20:3n-6    | 3.43                 | 0.10 | 2.92   | 0.94    | 0.23 | 24.47  | 0.06           |
| 20:3n-3    | 3.50                 | 0.14 | 4.00   | 0.11    | 0.03 | 27.27  | 0.30           |
| 20:4n-6    | 3.37                 | 0.09 | 2.67   | 11.88   | 2.33 | 19.61  | 0.18           |
| 20:5n-3    | 3.66                 | 0.22 | 6.01   | 1.46    | 0.27 | 18.49  | 0.005          |
| 22:0       | 3.32                 | 0.29 | 8.73   | 0.31    | 0.07 | 22.58  | 0.17           |
| 22:1n-9    | 3.50                 | 0.33 | 9.43   | 0.82    | 0.22 | 26.83  | 0.14           |
| 22:2n-6    | 2.79                 | 0.26 | 9.32   | 0.08    | 0.03 | 37.5   | 0.25           |
| 22:4n-6    | 3.18                 | 0.22 | 6.92   | 2.34    | 0.41 | 17.52  | 0.16           |
| 22:5n-3    | 3.04                 | 0.18 | 5.92   | 1.90    | 0.35 | 18.42  | 0.003          |
| 22:6n-3    | 2.85                 | 0.28 | 9.82   | 4.24    | 0.71 | 16.75  | 0.10           |
| 24:0       | 3.34                 | 0.32 | 9.58   | 2.31    | 0.43 | 18.61  | 0.51           |
| 24:1n-9    | 3.54                 | 0.24 | 6.78   | 4.72    | 0.65 | 13.77  | 0.006          |

<sup>a</sup> Mixture of fatty acid methyl ester standards, fresh batches of mixtures were prepared every 1 months. <sup>b</sup> Oneway ANOVA between monthly detected samples. Abbreviation: SD, standard deviation; CV, coefficient of variation.
